# Supplementary material
Source: PubMed Central journal article supplement (PMC10586062)
Supplement: NIHMS1933816-supplement-1.pdf [file NIHMS1933816-supplement-1.pdf]

Supplemental Figure 1

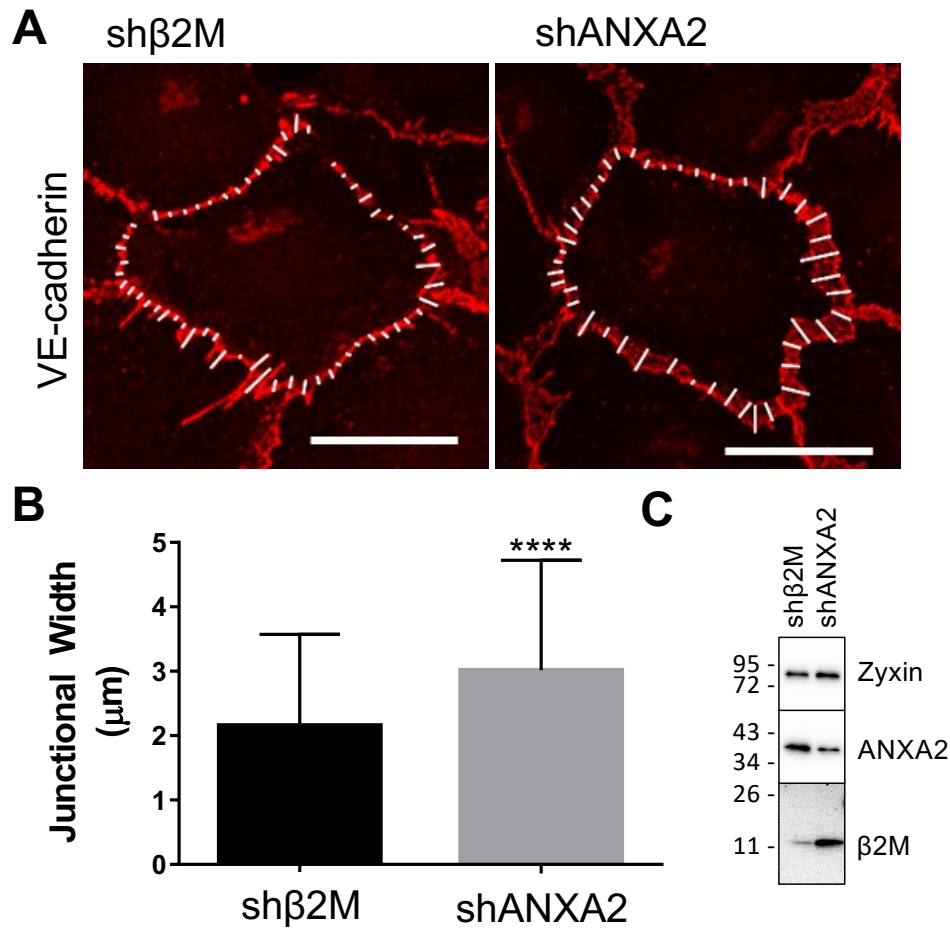

**Supplemental Figure S1.** Junctional width increases with loss of ANXA2 during one hour of S1P activation. **A)** Immunofluorescence of VE-cadherin in sh $\beta$ 2M and shANXA2 cells, seeded onto collagen-coated coverslips and activated by S1P for one hour. White lines at junctions denote width measurements. Scale bar = 10  $\mu$ m. **B)** Average junctional width ( $\mu$ m). N = at least 150 points per treatment. Student's t-test: \*\*\*\*,  $p < 0.0001$  versus sh $\beta$ 2M. Experiment repeated three times with representative data shown. **C)** Western blot showing confirmation of knock-down of ANXA2 and  $\beta$ 2M, along with Zyxin loading control.

## Supplemental Figure 2

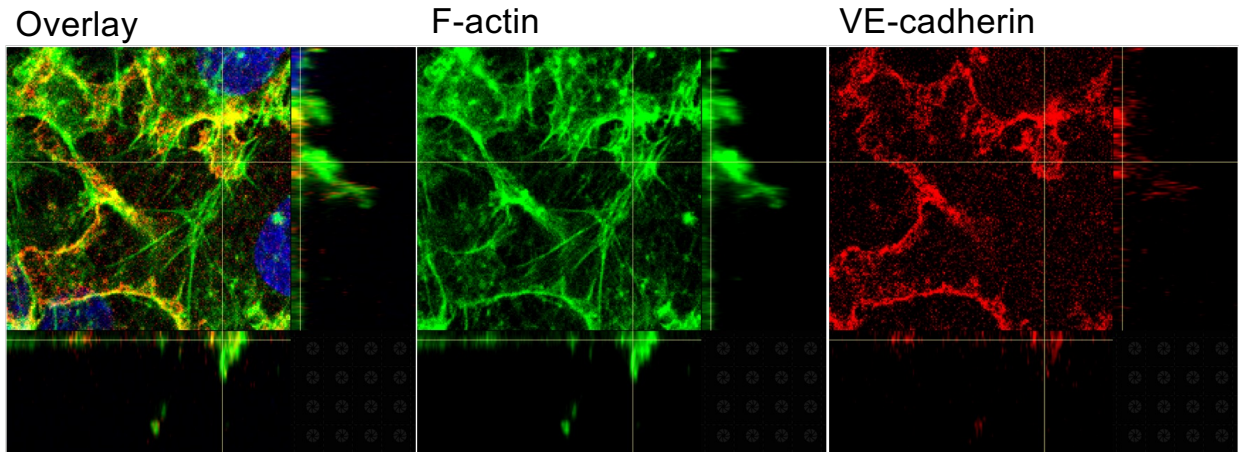

**Supplemental Figure S2.** Orthogonal view of sprout initiation at VE-cadherin-positive junctions after 1 hour. Samples were stained with F-actin (green), VE-cadherin (red) and DAPI (blue). Yellow lines indicate positions of displayed X and Y slices shown at the bottom and right of each image, respectively. Images were generated using NIS elements.

Supplemental Figure 3

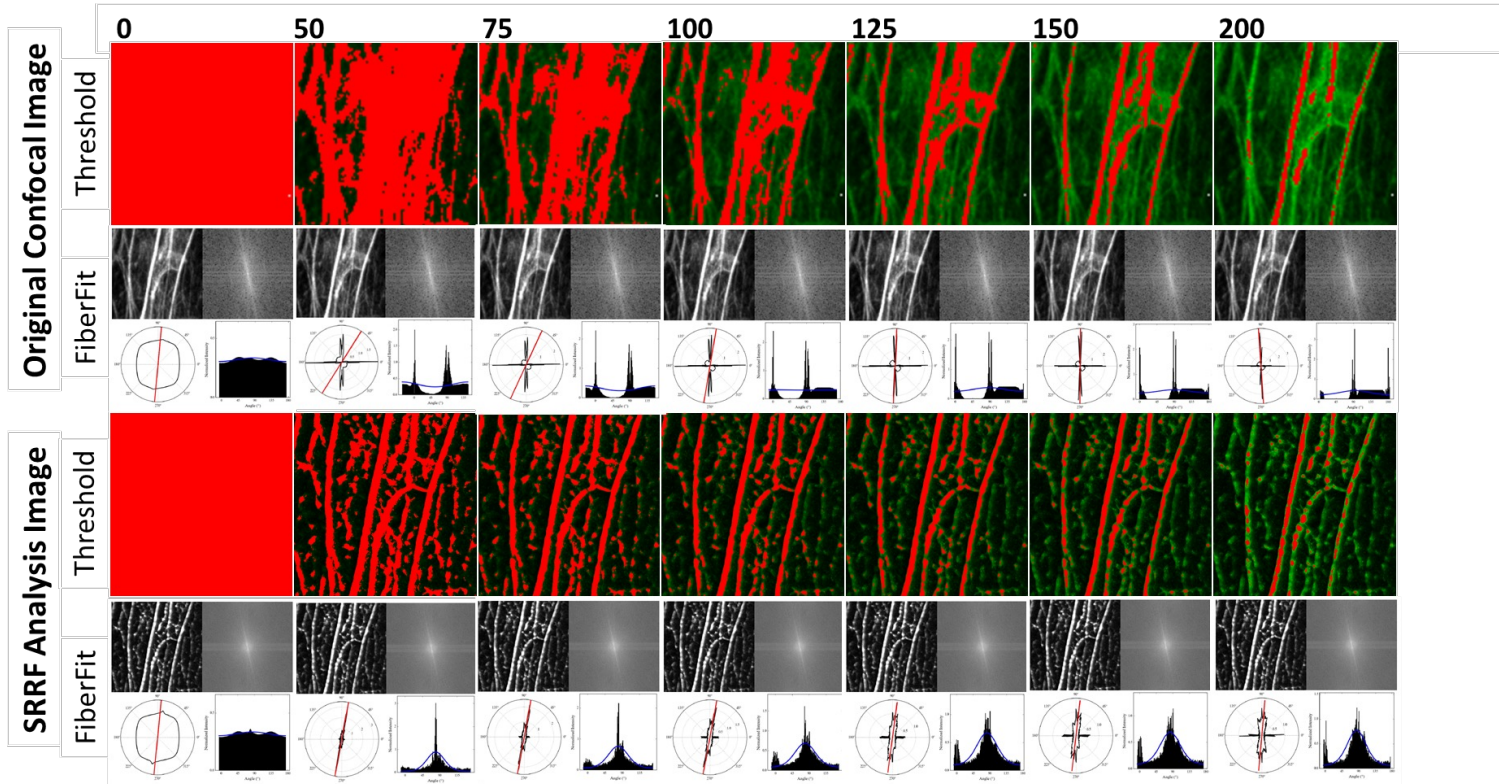

**Supplemental Figure S3.** Benefits of SRRF analysis prior to FiberFit™. Cropped ROI of 100x confocal image taken at 1024 resolution. **Top)** Original confocal image at a given threshold (red denotes signal included for FiberFit Software™ analysis) and results output of that threshold. **Bottom)** Same field after SRRF analysis with different thresholds. Note: Threshold application with SRRF images provides a more representative output from FiberFit Software™ while preserving signal.

Supplemental Figure 4

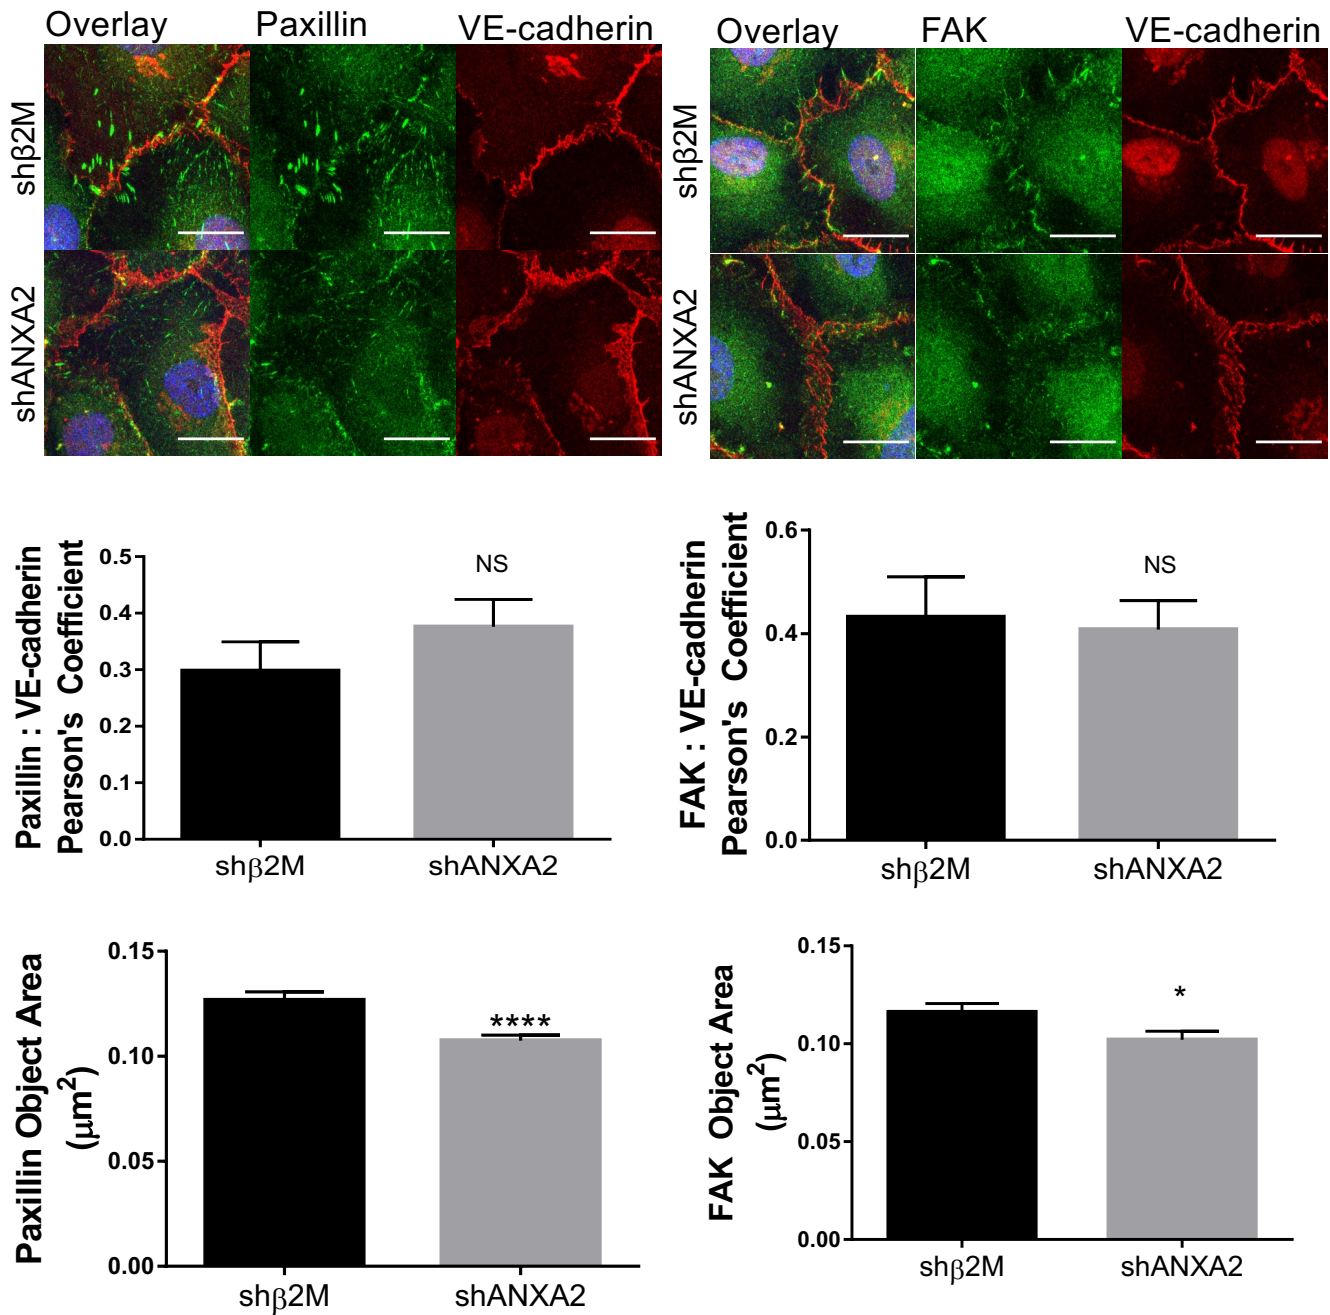

**Supplemental Figure S4.** Focal adhesion size is reduced with ANXA2 knock-down. **A)** Immunofluorescence of sh $\beta$ 2M and shANXA2 HUVEC after 1 hour S1P, then labelled for Paxillin or FAK (green) and VE-cadherin (red). Blue staining in Overlay panel indicates DAPI staining. Scale bars: 10  $\mu$ m. **B)** Quantified colocalization between Paxillin and VE-cadherin and FAK and VE-cadherin, as measured by Pearson's Coefficient. n = 5 fields per treatment. Student's t-test: NS = Not significant. **C)** Quantified average object area of Paxillin or FAK signal, denoting focal adhesion size after applying a threshold. n > 2500 focal adhesions per treatment. Student's t-test: \*\*\*\*, p < 0.0001 for Paxillin, \*, p < 0.05 for FAK. All experiments repeated at least three times with representative data shown.



Supplemental Figure 5

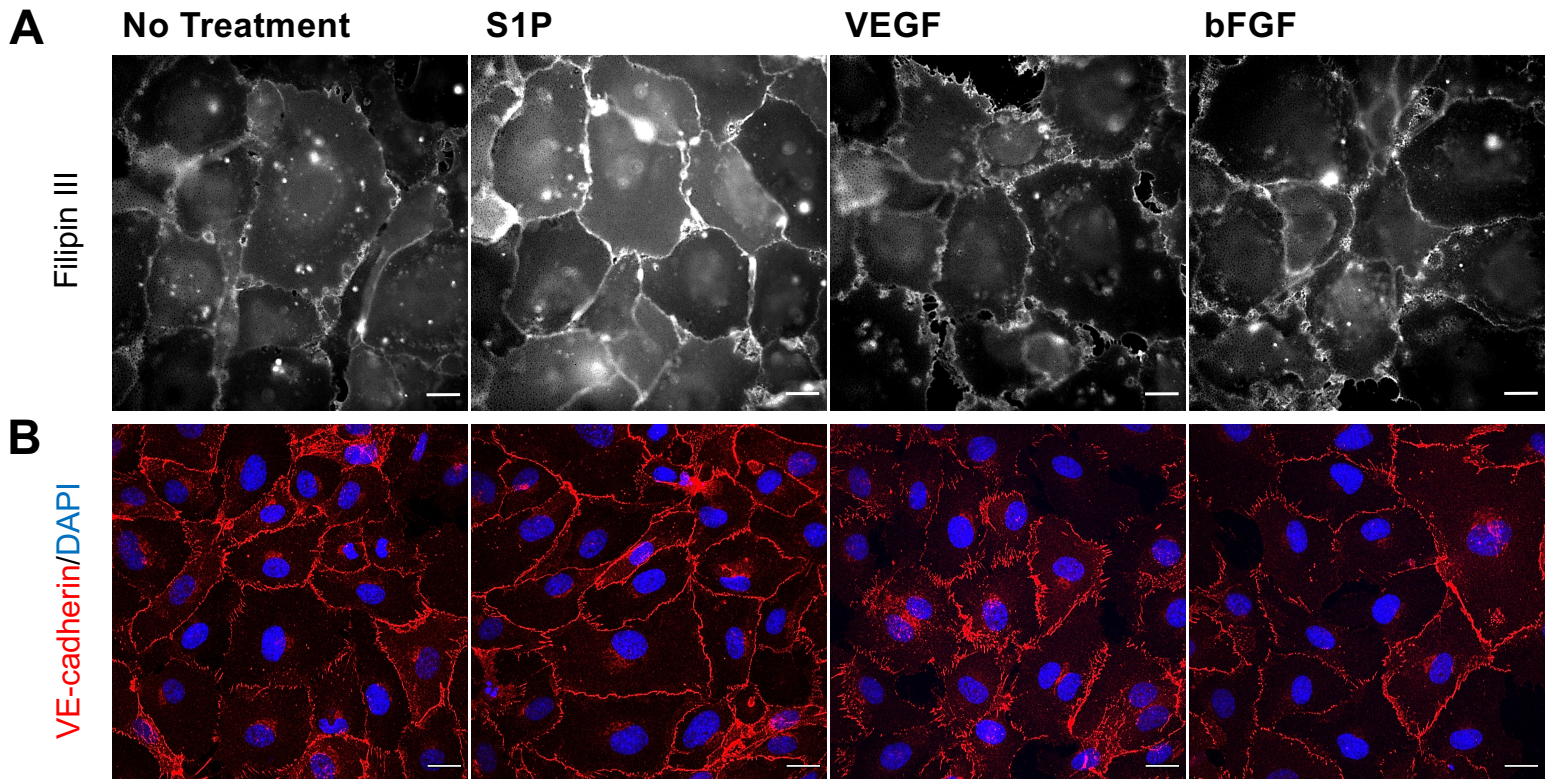

**Supplemental Figure S5.** S1P enhances filipin III labeling of cholesterol at junctions but not VEGF or bFGF. HUVEC were seeded onto collagen-coated coverslips overnight, serum-starved, and treated for one hour with S1P, VEGF, or bFGF. **A)** Cholesterol localization as labeled by filipin III. **B)** Blue signal indicates DAPI staining. VE-cadherin signal defines adherens junctions. Note robust, linear signal at junctions in S1P-treated cells that is not present in cells with no treatment, VEGF, or bFGF treatments. Scale bar: 10  $\mu$ m.

Supplemental Figure 6

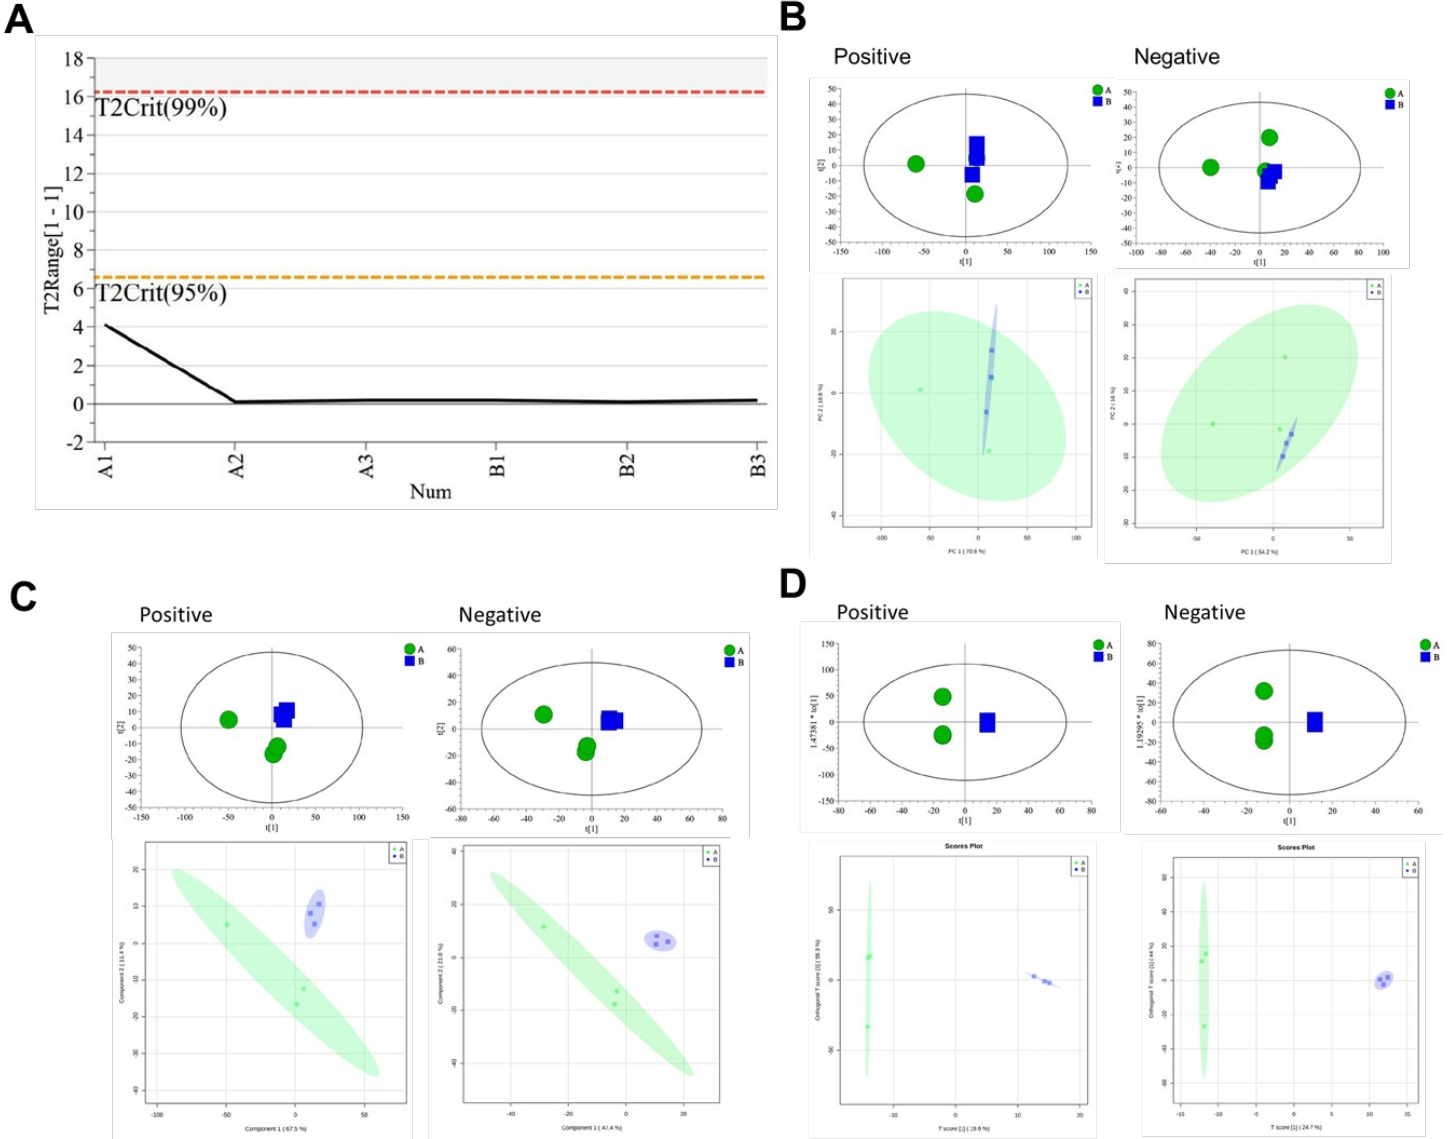

**Supplemental Figure S6.** Quality control and modeling of LC-MS data via different clustering algorithms. **A)** Quality control of system stability prior to LC-MS analysis. A1-3 denote shANXA2 samples, B1-3 denote sh $\beta$ 2M samples. **B)** Clustering of samples by Principal Component Analysis. **C)** Clustering of samples by Partial Least Squares Discriminant Analysis. **D)** Clustering of samples by Orthogonal Partial Least Squares Discriminant Analysis.

# Positive

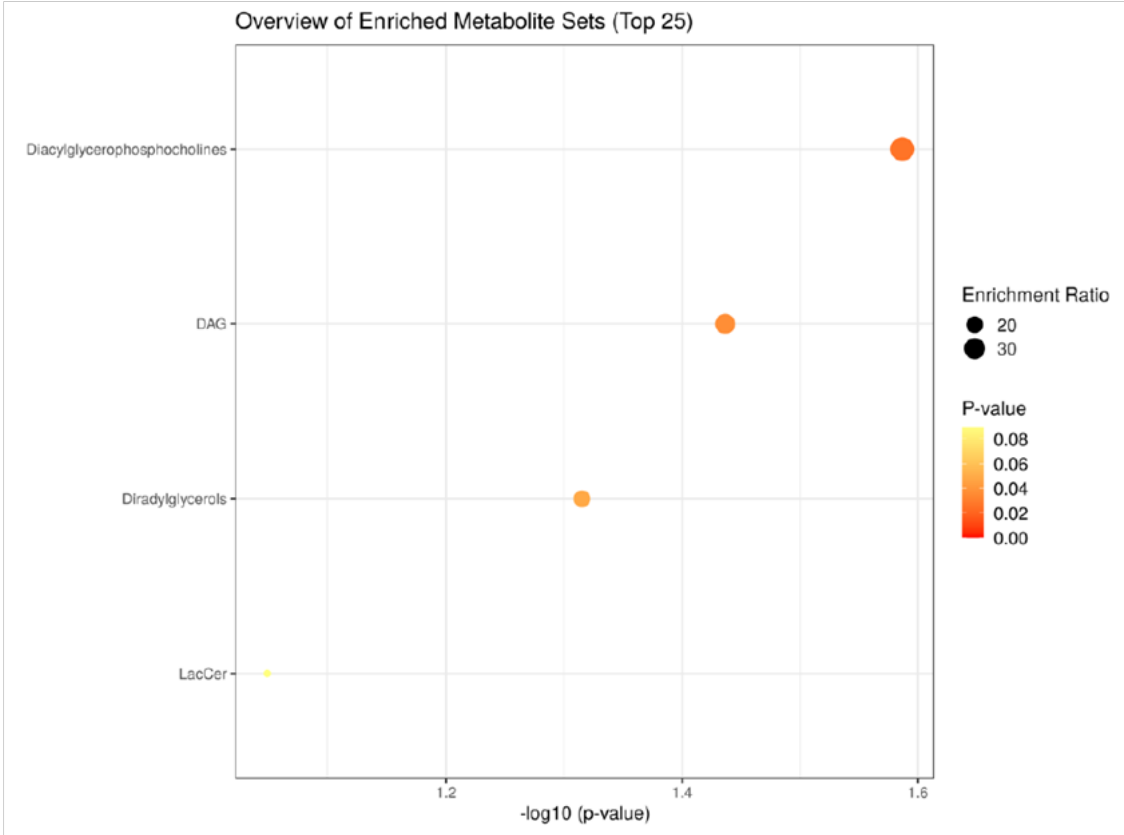

# Negative

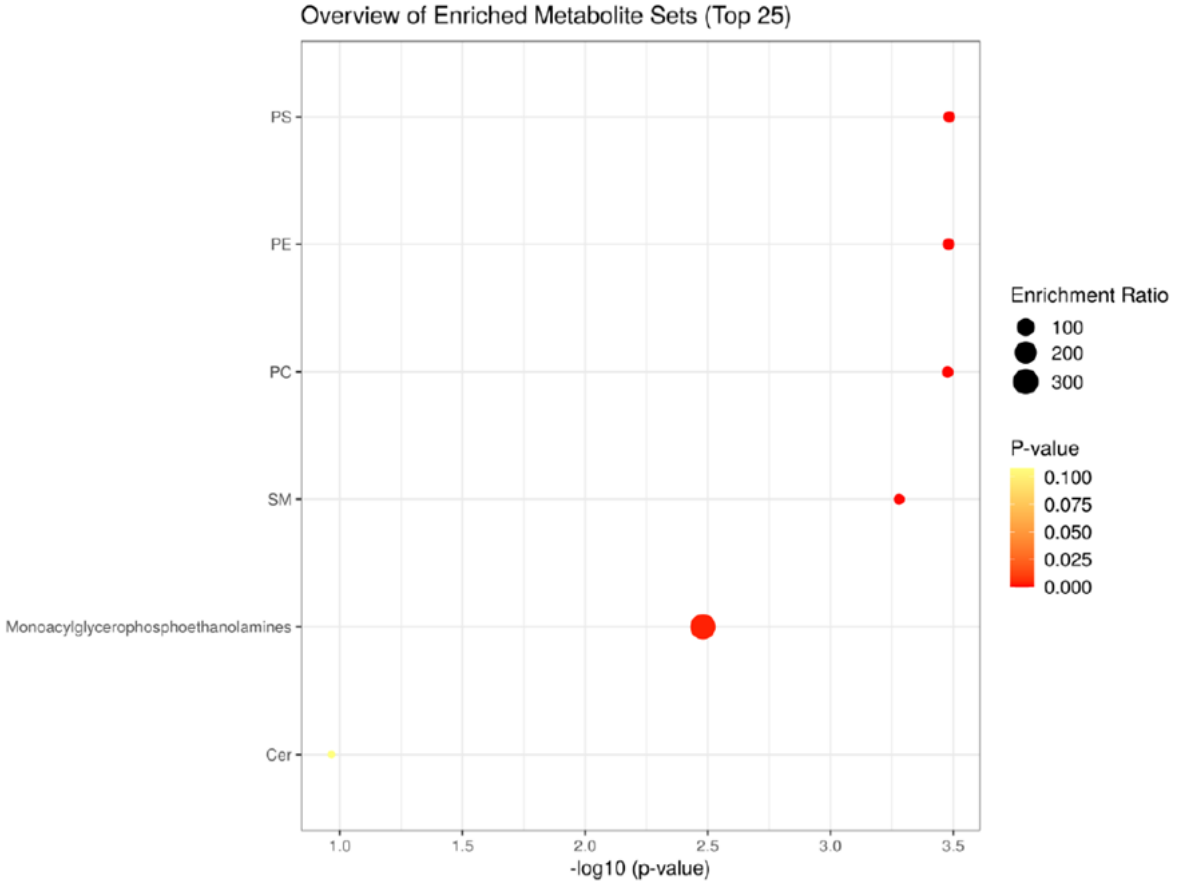

**Supplemental Figure S7.** Pathways that were determined to be impacted by loss of ANXA2 using KEGG databases. Note: Plot is sh $\beta$ 2M relative to shANXA2.



## Supplemental Figure 8

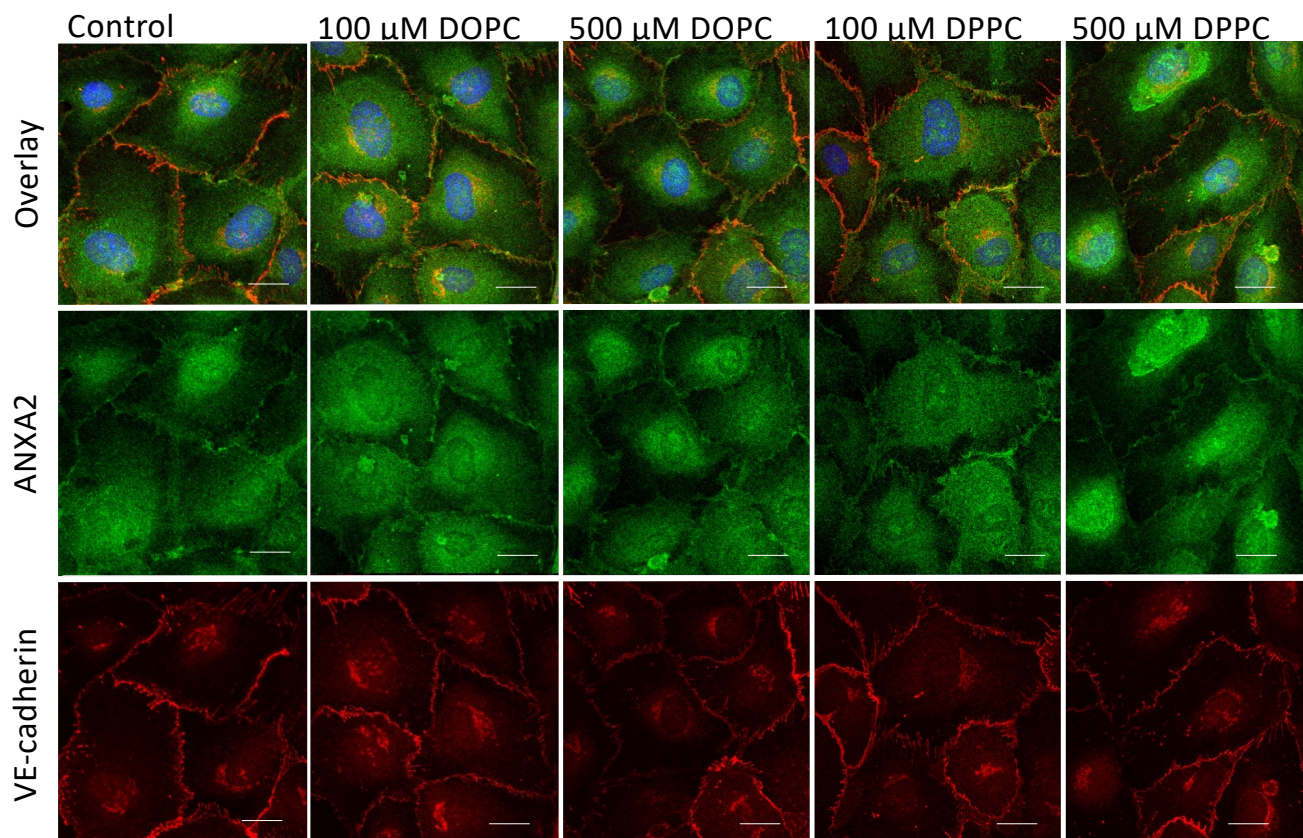

**Supplemental Figure S8.** DPPC treatment does not alter ANXA2's ability to localize to junctions with S1P treatment. Primary HUVEC were seeded on coverslips and treated overnight with DPPC or DOPC, then treated with S1P for one hour. Cells were stained with ANXA2 (green) and VE-cadherin (red). Blue staining in Overlay panels indicates DAPI staining. Scale bar: 10  $\mu$ M. All treatments were repeated independently at least three times with representative data shown.



## Supplemental Table 1

| Class   | FA1   | FA2  | Fold Change | Log2 Fold Change | T-Test |
|---------|-------|------|-------------|------------------|--------|
| BisMePA | 14:1e | 18:0 | 0.0825      | -3.6003          | 0.0203 |
| Cer     | d18:1 | 24:0 | 0.2593      | -1.9473          | 0.0413 |
| Cer     | d44:2 |      | 0.2122      | -2.2365          | 0.0343 |
| Hex2Cer | d29:1 |      | 0.2917      | -1.7775          | 0.0494 |
| DG      | 18:0  |      | 0.3826      | -1.3862          | 0.0387 |
| DG      | 18:1  | 18:1 | 0.3700      | -1.4343          | 0.0476 |
| PC      | 11:0  | 21:1 | 0.2169      | -2.2048          | 0.0077 |
| PC      | 16:0  | 16:0 | 2.8089      | 1.4900           | 0.0495 |
| PC      | 17:1  | 18:1 | 0.3805      | -1.3941          | 0.0354 |
| PC      | 18:0  | 14:1 | 0.2833      | -1.8197          | 0.0146 |
| PC      | 18:0  | 16:1 | 0.2407      | -2.0548          | 0.0411 |
| PC      | 18:1  | 18:3 | 0.0476      | -4.3942          | 0.0001 |
| PC      | 19:0  | 18:2 | 0.2535      | -1.9798          | 0.0312 |
| PC      | 20:3  | 20:4 | 0.2453      | -2.0272          | 0.0094 |
| PC      | 40:5  |      | 0.1928      | -2.3749          | 0.0003 |
| PC      | 40:4e |      | 0.2729      | -1.8737          | 0.0491 |
| MePC    | 37:2  |      | 0.1807      | -2.4684          | 0.0002 |
| MePC    | 37:1e |      | 0.2729      | -1.8737          | 0.0491 |
| PE      | 16:0  | 14:0 | 0.3093      | -1.6931          | 0.0348 |
| PE      | 16:1  | 18:1 | 0.3115      | -1.6828          | 0.0477 |
| PE      | 18:1  | 20:5 | 0.0520      | -4.2644          | 0.0145 |
| PE      | 18:1  | 21:1 | 0.2392      | -2.0634          | 0.0040 |
| PE      | 18:1  | 24:0 | 0.2420      | -2.0470          | 0.0363 |
| PE      | 28:1  | 6:0  | 0.3980      | -1.3292          | 0.0436 |
| PE      | 16:0p | 20:3 | 0.3698      | -1.4350          | 0.0277 |
| PE      | 18:0e | 20:4 | 0.2073      | -2.2704          | 0.0106 |
| dMePE   | 16:0  | 18:1 | 0.0868      | -3.5267          | 0.0226 |
| dMePE   | 18:0  | 16:0 | 0.2613      | -1.9362          | 0.0314 |
| dMePE   | 19:1  | 18:1 | 0.0772      | -3.6951          | 0.0000 |
| LdMePE  | 16:1  |      | 0.3042      | -1.7167          | 0.0385 |
| LPE     | 18:1  |      | 0.3112      | -1.6841          | 0.0411 |
| PS      | 18:0  | 18:1 | 0.2725      | -1.8757          | 0.0083 |
| PS      | 20:1  | 18:1 | 0.3636      | -1.4596          | 0.0312 |
| PS      | 38:1  |      | 0.3805      | -1.3941          | 0.0354 |
| PS      | 42:9  |      | 2.5212      | 1.3341           | 0.0391 |
| SM      | d19:0 | 15:1 | 0.3843      | -1.3797          | 0.0452 |
| SM      | d19:1 | 23:0 | 0.0030      | -8.3710          | 0.0000 |
| SM      | d34:0 |      | 0.1663      | -2.5881          | 0.0289 |
| SM      | d41:2 |      | 0.1970      | -2.3437          | 0.0338 |
| SM      | d42:1 |      | 0.2019      | -2.3083          | 0.0188 |
| SM      | t40:1 |      | 0.1481      | -2.7555          | 0.0391 |

**Supplemental Table 1.** Listed fold change and significance of lipid species affected by loss of ANXA2 after 1 hour of S1P treatment. Lipids that increase with loss of ANXA2 are highlighted yellow.
